# Supplementary material for: Racial-Ethnic Differences in Mental Health Stigma and Changes Over the Course of a Statewide Campaign
Source: Atypon-hosted journal article supplement (doi:10.1176/appi.ps.201900630), 2021-03-11
Supplement: appi.ps.201900630.ds001.pdf [file appi.ps.201900630.ds001.pdf]

**Supplementary Table: Weighted Percentage, Standard Deviation (SD), Chi-Square, and p-values of Changes in Stigma Domains between the 2013 and 2014 California Statewide Surveys by Race-Ethnicity and Language**

|                                             |                   | 2013 |      | 2014 |      | Chi-Square | p    |
|---------------------------------------------|-------------------|------|------|------|------|------------|------|
| Race-ethnicity                              |                   | %    | SD   | %    | SD   |            |      |
| <b>Social Distance</b>                      |                   |      |      |      |      |            |      |
| Unwilling to move next door                 | White             | 26   | 0.60 | 25   | 0.60 | 0.15       | 0.70 |
|                                             | Latino-English    | 32   | 0.81 | 22   | 0.72 | 13.04      | 0.00 |
|                                             | Latino-Spanish    | 56   | 0.87 | 53   | 0.87 | 1.82       | 0.18 |
|                                             | Asian-English     | 45   | 0.72 | 29   | 0.65 | 10.22      | 0.00 |
|                                             | Asian non-English | 62   | 0.64 | 56   | 0.66 | 1.89       | 0.17 |
|                                             | Black             | 29   | 0.39 | 23   | 0.36 | 1.95       | 0.16 |
| Unwilling to spend an evening socializing   | White             | 13   | 0.47 | 13   | 0.46 | 0.26       | 0.61 |
|                                             | Latino-English    | 19   | 0.67 | 12   | 0.55 | 10.86      | 0.00 |
|                                             | Latino-Spanish    | 61   | 0.86 | 52   | 0.88 | 9.88       | 0.00 |
|                                             | Asian-English     | 16   | 0.52 | 10   | 0.43 | 2.62       | 0.11 |
|                                             | Asian non-English | 33   | 0.63 | 32   | 0.63 | 0.01       | 0.91 |
|                                             | Black             | 14   | 0.30 | 19   | 0.34 | 1.89       | 0.17 |
| Unwilling to start working closely on a job | White             | 25   | 0.59 | 24   | 0.59 | 0.02       | 0.90 |
|                                             | Latino-English    | 21   | 0.71 | 22   | 0.72 | 0.16       | 0.69 |
|                                             | Latino-Spanish    | 53   | 0.86 | 41   | 0.85 | 13.27      | 0.00 |
|                                             | Asian-English     | 27   | 0.64 | 21   | 0.58 | 2.59       | 0.11 |
|                                             | Asian non-English | 53   | 0.66 | 51   | 0.66 | 0.35       | 0.55 |
|                                             | Black             | 25   | 0.37 | 23   | 0.36 | 0.16       | 0.69 |
| <b>Traditional Prejudice</b>                |                   |      |      |      |      |            |      |
| Never going to contribute much to society   | White             | 5    | 0.30 | 6    | 0.34 | 2.82       | 0.09 |
|                                             | Latino-English    | 4    | 0.35 | 10   | 0.51 | 11.06      | 0.00 |
|                                             | Latino-Spanish    | 39   | 0.85 | 37   | 0.84 | 0.39       | 0.53 |
|                                             | Asian-English     | 11   | 0.46 | 9    | 0.42 | 0.29       | 0.59 |
|                                             | Asian non-English | 41   | 0.65 | 43   | 0.65 | 0.16       | 0.69 |
|                                             | Black             | 12   | 0.28 | 8    | 0.24 | 1.36       | 0.24 |

|                                                                                           | Race-ethnicity    | 2013 |      | 2014 |      | Chi-Square | p     |
|-------------------------------------------------------------------------------------------|-------------------|------|------|------|------|------------|-------|
|                                                                                           |                   | %    | SD   | %    | SD   |            |       |
| <b>Perceptions of Dangerousness</b><br>A person with mental illness is a danger to others | White             | 19   | 0.54 | 17   | 0.52 | 1.86       | 0.17  |
|                                                                                           | Latino-English    | 20   | 0.69 | 20   | 0.69 | 0.02       | 0.88  |
|                                                                                           | Latino-Spanish    | 42   | 0.86 | 51   | 0.87 | 9.14       | 0.00  |
|                                                                                           | Asian-English     | 16   | 0.53 | 17   | 0.55 | 0.07       | 0.79  |
|                                                                                           | Asian non-English | 60   | 0.65 | 61   | 0.65 | 0.06       | 0.81  |
|                                                                                           | Black             | 22   | 0.36 | 21   | 0.35 | 0.08       | 0.78  |
| <b>Treatment Carryover</b><br>Would delay treatment for fear of others knowing            | White             | 11   | 0.44 | 13   | 0.46 | 1.45       | 0.23  |
|                                                                                           | Latino-English    | 18   | 0.66 | 22   | 0.72 | 3.36       | 0.07  |
|                                                                                           | Latino-Spanish    | 16   | 0.64 | 12   | 0.57 | 1.97       | 0.16  |
|                                                                                           | Asian-English     | 29   | 0.66 | 28   | 0.65 | 0.16       | 0.69  |
|                                                                                           | Asian non-English | 10   | 0.41 | 11   | 0.41 | 0.01       | 0.94  |
|                                                                                           | Black             | 10   | 0.25 | 14   | 0.30 | 1.77       | 0.18  |
| Would go for professional help                                                            | White             | 94   | 0.33 | 94   | 0.32 | 0.13       | 0.72  |
|                                                                                           | Latino-English    | 93   | 0.43 | 93   | 0.43 | 0.00       | 0.95  |
|                                                                                           | Latino-Spanish    | 98   | 0.24 | 97   | 0.30 | 1.02       | 0.31  |
|                                                                                           | Asian-English     | 91   | 0.42 | 85   | 0.52 | 4.20       | 0.04  |
|                                                                                           | Asian non-English | 78   | 0.55 | 89   | 0.41 | 6.05       | 0.01  |
|                                                                                           | Black             | 93   | 0.21 | 95   | 0.19 | 0.30       | 0.58  |
| <b>Disclosure carryover</b><br>Would hide mental illness from co-workers or classmates    | White             | 56   | 0.69 | 60   | 0.68 | 5.15       | 0.02  |
|                                                                                           | Latino-English    | 52   | 0.86 | 52   | 0.86 | 0.00       | 0.97  |
|                                                                                           | Latino-Spanish    | 11   | 0.55 | 18   | 0.67 | 8.03       | 0.00  |
|                                                                                           | Asian-English     | 44   | 0.71 | 65   | 0.69 | 19.31      | <.001 |
|                                                                                           | Asian non-English | 32   | 0.63 | 19   | 0.53 | 12.49      | 0.00  |
|                                                                                           | Black             | 50   | 0.43 | 45   | 0.43 | 1.33       | 0.25  |
| Would hide mental illness from family or friends                                          | White             | 23   | 0.58 | 26   | 0.60 | 4.20       | 0.04  |
|                                                                                           | Latino-English    | 22   | 0.72 | 19   | 0.68 | 2.64       | 0.10  |
|                                                                                           | Latino-Spanish    | 12   | 0.56 | 15   | 0.62 | 1.35       | 0.25  |
|                                                                                           | Asian-English     | 29   | 0.66 | 32   | 0.67 | 0.25       | 0.62  |
|                                                                                           | Asian non-English | 17   | 0.51 | 14   | 0.46 | 0.85       | 0.36  |
|                                                                                           | Black             | 22   | 0.35 | 18   | 0.33 | 0.76       | 0.38  |

|                                                                 | Race-ethnicity    | 2013 |      | 2014 |      | Chi-Square | p    |
|-----------------------------------------------------------------|-------------------|------|------|------|------|------------|------|
|                                                                 |                   | %    | SD   | %    | SD   |            |      |
| <b>Perceived public stigma</b>                                  |                   |      |      |      |      |            |      |
| People are caring and sympathetic to people with mental illness | White             | 34   | 0.65 | 34   | 0.65 | 0.02       | 0.89 |
|                                                                 | Latino-English    | 37   | 0.84 | 32   | 0.81 | 2.84       | 0.09 |
|                                                                 | Latino-Spanish    | 53   | 0.87 | 46   | 0.87 | 3.57       | 0.06 |
|                                                                 | Asian-English     | 44   | 0.72 | 44   | 0.72 | 0.00       | 0.97 |
|                                                                 | Asian non-English | 92   | 0.36 | 89   | 0.42 | 1.11       | 0.29 |
|                                                                 | Black             | 48   | 0.43 | 43   | 0.43 | 1.12       | 0.29 |
| People with mental illness experience high levels of prejudice  | White             | 76   | 0.58 | 82   | 0.53 | 13.19      | 0.00 |
|                                                                 | Latino-English    | 73   | 0.77 | 79   | 0.70 | 7.69       | 0.01 |
|                                                                 | Latino-Spanish    | 80   | 0.70 | 80   | 0.69 | 0.02       | 0.89 |
|                                                                 | Asian-English     | 76   | 0.62 | 73   | 0.64 | 0.57       | 0.45 |
|                                                                 | Asian non-English | 61   | 0.65 | 68   | 0.62 | 3.06       | 0.08 |
|                                                                 | Black             | 63   | 0.41 | 77   | 0.36 | 7.17       | 0.01 |
| <b>Courtesy stigma</b>                                          |                   |      |      |      |      |            |      |
| Would feel ashamed if family had mental illness                 | White             | 6    | 0.32 | 5    | 0.31 | 0.10       | 0.75 |
|                                                                 | Latino-English    | 4    | 0.34 | 7    | 0.43 | 4.48       | 0.03 |
|                                                                 | Latino-Spanish    | 3    | 0.28 | 3    | 0.30 | 0.11       | 0.75 |
|                                                                 | Asian-English     | 10   | 0.44 | 11   | 0.45 | 0.15       | 0.70 |
|                                                                 | Asian non-English | 13   | 0.45 | 13   | 0.45 | 0.02       | 0.88 |
|                                                                 | Black             | 2    | 0.13 | 1    | 0.10 | 0.40       | 0.53 |
